# Supplementary material for: Genome-wide association of phenotypes based on clustering patterns of hand osteoarthritis identify WNT9A as novel osteoarthritis gene
Source: PubMed Central journal article supplement — Ann Rheum Dis. 2020 Oct 14;80(3):367–75. doi: 10.1136/annrheumdis-2020-217834 (PMC7892373; doi:10.1136/annrheumdis-2020-217834), 2020-10-14
Supplement: annrheumdis-2020-217834supp001.pdf [file annrheumdis-2020-217834supp001.pdf]

## 1 **Supplementary Text**

2 Supplementary materials for *Boer C.G., et al., Stratified hand phenotypes identifies WNT9A*  
3 *as novel gene associated with thumb osteoarthritis.*

### 4 **Contents**

#### 5 **Supplementary methods**

- 6 • Description of the Rotterdam Study
- 7 • Description of the Framingham Heart Study
- 8 • Patient and Public Involvement
- 9 • GWAS, discovery, replication and meta-analysis
- 10 • Hand osteoarthritis Cluster Analysis
- 11 • Variant functional annotation
- 12 • Human Embryonic cartilage ATAC-seq
- 13 • Gene prioritization
- 14 • RNA-sequencing for differential expression
- 15 • Expression quantitative trait loci analysis
- 16 • Methylation quantitative trait loci analysis

#### 17 **References**

18

## 1 **Supplementary methods**

### 2 *Description of the Rotterdam Study (RS)*

3 The Rotterdam Study(RS) is a prospective population based cohort consisting of elderly  
4 inhabitants, 45 years and older, of the Ommoord district in the city of Rotterdam, the  
5 Netherlands<sup>1</sup>. The RS has been ongoing since 1990 to study the determinants of chronic  
6 disabling disease in the elderly. The Rotterdam Study I (RS-I) is the first cohort, of 7,983  
7 persons living in the Ommoord district of Rotterdam in the Netherlands. All subjects were  
8 aged 55 years and older, recruitment of participants started in 1990. The Rotterdam  
9 Study II (RS-II) started in 1999 when 3,011 participants moved into the study since they  
10 became 55 years of age or moved into the study district. The Rotterdam Study III (RS-III)  
11 started in 2006 with all 3,932 participants aged 45 years and older from the study district  
12 not yet included in the study. The present study includes all participants for whom  
13 radiographs of the hand joints at baseline visit were present. During the visit to the study  
14 center (online supplementary Table S1), bilateral hand radiographs were made during the  
15 baseline visit, which were examined and scored by trained radiologists<sup>2</sup>. For both hands  
16 all distal interphalangeal joints (DIP), interphalangeal joints (PIP), metacarpophalangeal  
17 joints (MCP), thumb interphalangeal joint(IP), first carpometacarpal (CMC1) joint and the  
18 trapezioscapoid (TS) joint were scored according to the Kellgren-Lawrence (KL) OA  
19 severity grading scale<sup>3</sup>. For 1,609 participants, we were unable to score one or more  
20 joints, or genetic data was ,not available, which left us with a total of 8,691 participants  
21 to perform the study. The interobserver reliability for KL $\geq$ 2 was: DIP:  $\kappa$ =0.60, PIP =0.61,  
22 MCP =0.63 and CMC1/TS=0.75<sup>2</sup>.

23

24 The Rotterdam Study has been approved by the Medical Ethics Committee of the  
25 Erasmus MC (registration number MEC 02.1015) and by the Dutch Ministry of Health,  
26 Welfare and Sport (Population Screening Act WBO, license number 1071272-159521-  
27 PG). The Rotterdam Study has been entered into the Netherlands National Trial Register  
28 (NTR; [www.trialregister.nl](http://www.trialregister.nl)) and into the WHO International Clinical Trials Registry  
29 Platform (ICTRP; [www.who.int/ictrp/network/primary/en/](http://www.who.int/ictrp/network/primary/en/)) under shared catalogue  
30 number NTR6831. All participants provided written informed consent to participate in  
31 the study and to have their information obtained from treating physicians

32

### 33 *Description of the Framingham Heart Study(FHS)*

1 The original Framingham Study was a population-based sample of adults (ages 28-61  
2 years) that began in 1948<sup>4</sup>. The Framingham Offspring Study is composed of children of  
3 the original Framingham Heart Study participants, and the children's spouses<sup>5</sup>. As part of  
4 an ancillary study in 1992 to 1995, Offspring (and their spouses) were contacted by mail  
5 and telephone call to participate in a visit to assess hand OA. About 1,800 individuals  
6 (ages 28-82 years) were examined, representing about 65% of those contacted. Of these  
7 individuals, 1,293 participants returned for another hand examination in 2002 to 2005<sup>6</sup>.  
8 As osteoarthritis often does not present until a later date, we have used data from the  
9 2002 to 2005 visit. Of which 1,203 had genotyping data available for analysis. Individuals  
10 underwent bilateral poster-anterior hand radiographs, which were read by a trained  
11 musculoskeletal radiologist. The bilateral 2nd-5th DIP, 2nd-5th PIP, 1st-5th MCP, IP,  
12 thumb base (carpometacarpal) joint and wrist joints were scored according to KL-score  
13 with good inter-reader reliability (weighted  $\kappa=0.76$ ).

14

#### 15 *Patient and Public Involvement*

16 Patients were involved in the design of this study, through the Dutch Arthritis Association  
17 (DAA) through the founding of this research (DAA 2010\_017). Patients and the general  
18 Public will be informed of the results through the dedicated website of the Dutch Arthritis  
19 Association (<https://reumanederland.nl/>), and via the Erasmus MC Rotterdam  
20 Osteoarthritis Research (ROAR) twitter account (@roar\_NL).

21

#### 22 *GWAS, discovery, replication and meta-analysis*

23 Genome-wide association (GWAS) methods of the discovery cohort have been described  
24 previously<sup>7</sup>, briefly genotyped variants were imputed after quality control using the  
25 Michigan imputation server (HRC panel v.1.1<sup>8</sup>). Genetic dosages were used to investigate  
26 association with the stratified hand OA phenotypes using RVTESTS<sup>9</sup>. All performed  
27 GWAS, including replication analysis, were adjusted for age, sex and the first four genetic  
28 principal components. We did not include BMI in our model, as inclusion of heritable and  
29 causally associated covariates can introduce "collider bias"<sup>10</sup>. Variants were considered  
30 for replication if  $p\text{-value} \leq 1 \times 10^{-6}$ . Meta-analysis between discovery (RS) and replication  
31 (FHS) was performed using inverse variance weighting (METAL<sup>11</sup>). Variants were  
32 considered "replicated and genome-wide significant if their replication  $p\text{-value} < 0.05$ , had

1 the same direction of the beta and the meta-analysis p-value $<5*10^{-08}$  (Genome-wide  
2 significance threshold)<sup>12</sup>. Variants were considered genome-wide suggestive when they  
3 were replicated and the meta-analysis p-value $<1*10^{-06}$ . Independence for each signal was  
4 determined by conditional-joint analysis(Jo-Co) in GCTA<sup>13</sup>. Manhattan, QQ-plots and  
5 heatmap plots were made in R<sup>14</sup> using the CRAN software packages qqman, gplots and  
6 RcolorBrewer. Images were saved in. eps format, font size, style and additional text were  
7 added/modified using Adobe Illustrator.

8

### 9 *Hand osteoarthritis Cluster Analysis*

10 Cluster analysis was performed on all hand joints in the RS cohorts (n=8,691). The goal  
11 was to organize the observed data into meaningful clusters using hierarchical clustering  
12 of a Euclidean distance matrix using Ward's method. For each radiographic measurement  
13 separately (joint space narrowing, osteophytes, and KL-score) we performed  
14 normalization of the data through scaling the data across the joints and calculated a  
15 distance matrix based on Euclidean distances. Next, we used Ward's agglomerative  
16 hierarchical clustering method to generate tree diagrams. Where the vertical axis  
17 denoted the linkage distance. We used multidimensional scaling (MDS) to further detect  
18 biologically interpretable clusters between the joints groups. For the multidimensional  
19 scaling we used 2 dimensions. We scaled the data and calculated a distance matrix based  
20 on Euclidean distances to be used in the MDS. These cluster analysis were also performed  
21 on the radiographic KLscore of each measured joint of the hand separately, without  
22 grouping joints per type. Clusters were determined by comparing the results from all  
23 cluster analysis. The following clusters were recognized: finger KLsum included all DIP  
24 and PIP joints, excluding the IP joints, as these cluster either more with the MCP in the  
25 KL-grade, or the DID/PIP dependent on the radiographic feature examined (online  
26 supplementary Figure S1 and S2). The Finger KLsum score includes in total the KL grade  
27 of 16 joints and can range from 0 to 64, where a score of 64 means that the maximum KL  
28 grade (4) was assigned to all joint included in the KLsum score. The thumb KLsum  
29 included the TS and the CMC1 joints, the IP joint was excluded as this did not cluster with  
30 CMC1 or TS joints in any of the radiographic features examined. The Thumb KLsum score  
31 includes in total the KL grade of 4 joints can range from 0 to 16, where a score of 16  
32 means that the maximum KL grade (4) was assigned to all joints included in the KLsum  
33 score. The hand KLsum included all DIP, PIP, MCP, IP and CMC1 joints, the IP and TS joint

1 were excluded, as these do not consistently cluster with the rest of the joints in the  
2 radiographic features examined. The Hand KLsum score includes in total the KL grade of  
3 30 joints and can range from 0 to 120, where a score of 120 means that the maximum KL  
4 grade (4) was assigned to all joints included in the KLsum score. All cluster analysis were  
5 performed in R.

6

#### 7 *Lookup in DECODE and UKbiobank osteoarthritis GWAS*

8 The SNVs identified in the discovery GWAS (RS) and replicated in the replication cohort  
9 (FHS) were also examined for association with clinical osteoarthritis in a meta-analysis  
10 of the Icelandic DECODE population cohort and the united kingdom based UKbiobank  
11 population cohort<sup>15,16</sup>. Information on osteoarthritis was derived from a national  
12 Icelandic hip or knee arthroplasty registry, electronic health records (using ICD10 codes),  
13 and a dedicated hand osteoarthritis database<sup>15,16</sup>.

14

#### 15 *Variant functional annotation*

16 A locus was defined as the region 500kb upstream and 500kb downstream from the lead  
17 SNP. For each lead variant SNPs in high LD ( $r^2 \geq 0.8$ ) were determined and annotated using  
18 annotation provided by FUMA and HaploregV4.<sup>17,18</sup> All variants were and gene  
19 regulatory region annotation were provided by the SNP2GENE tool from FUMA, Haploreg  
20 V4 annotation and from the ROADMAP and ENCODE projects<sup>19,20</sup>. Intersection of the  
21 variant with gene regulatory elements as predicted by histone post-translational  
22 modifications, were made by the ROADMAP project<sup>19</sup>. CTCF-protein binding Chip-seq  
23 peaks in primary osteoblast cells were generated by ENCODE<sup>20</sup> and visualized via UCSC  
24 genome-browser<sup>21</sup>. Annotation of the variant location, number of proteins bound and  
25 transcription factor(TF) binding motifs change was done via Haploreg V1.4. as described  
26 previously<sup>18</sup>. TF binding to gene promoter locations were taken from the ENCODE  
27 Transcription Factor Binding Site Profiles dataset<sup>20</sup> accessed through harmonizome<sup>22</sup>.

28

#### 29 *Human embryonic cartilage ATAC-seq*

30 Intersection of SNVs with open chromatin regions in human embryonic cartilage was  
31 done using ATAC-seq data. For a detailed description of this human embryonic ATAC seq  
32 dataset see<sup>23</sup>. We have acquired chromatin accessibility from human embryonic cartilage  
33 ATAC-seq datasets at E59 of gestation<sup>23</sup> to investigate if our lead SNV and variants in high

1 LD co-localized with these open chromatin regions. All variants in LD with the lead  
2 variant (hg19 coordinates) were intersected with E59 ATAC-seq peaks from four  
3 cartilage tissues (proximal femur, distal femur, proximal tibia and distal tibia) using the  
4 UCSC Genome Browser Table Browser tool. ATAC-seq peaks from these tissues were also  
5 used to map regulatory elements in the Wnt locus on human chromosome 1.

6

7

8

9

#### 10 *Gene prioritization*

11 Candidate genes in the locus were defined as: all genes annotated to be (partially) located  
12 within the locus (500 kb upstream and downstream of the lead SNV). All genes fitting this  
13 definition were considered as potential causal gene, in total we analyzed 18 genes  
14 (supplementary table 3). Genes were prioritized based on several lines of evidence:  
15 1) eQTL-analysis consisted of two separate hip OA cartilage datasets (n=29 and n=87) of  
16 which genotypes and RNA-seq data were available<sup>24,25</sup>. For each dataset an eQTL analysis  
17 was performed for each lead SNP with all genes in the locus. To increase detection power,  
18 we then meta-analyzed the result from both datasets together using a weighted meta-  
19 analysis based on p-values, sample size and direction of effect in METAL<sup>11</sup>. 3) The 3D  
20 chromatin structure of the locus was examined using Capture Hi-C data from human  
21 mesenchymal stem cells (hMSCs)<sup>26</sup>. We visualized the chromatin interactions between  
22 the lead SNV and possible causal SNV(s) with promoter regions of  
23 *WNT9A/WNT3A/JMJD4* and *SNAP47* and the rest of the investigated locus.

24

#### 25 *RNA-sequencing for differential expression*

26 Differential gene expression between OA lesioned and Preserved cartilage: Post-RNA  
27 isolation (Qiagen RNeasy Mini Kit, RIN >7) of 40 knee (15 paired preserved (P) and OA  
28 lesioned (OAL), 7 P only and 3 OAL only) and 28 hip (six paired P and OAL, 14 P only and  
29 2 OAL only) cartilage samples (supplementary table 3), paired-end 2×100 bp RNA library  
30 sequencing (Illumina TruSeq RNA-Library Prep Kit, Illumina HiSeq2000) resulted in an  
31 average of 10 million fragments per sample. Reads were aligned using GSNAP against  
32 GRCh37/hg19, in which SNPs from the Genome of the Netherlands consortium with a  
33 minor allele frequency (MAF) >1% were masked to prevent alignment bias. Number of

1 fragments per gene were used to assess quantile-adjusted conditional maximum  
2 likelihood (edgeR, R-package)<sup>27</sup>. Subsequently, differential gene expression analysis was  
3 performed pairwise between P and OAL samples for which we had RNA of both (n=21).

#### 4 5 *Expression quantitative trait loci analysis*

6 The eQTL-analysis consisted of two separate OA cartilage datasets (n=29 and n=87) of  
7 which genotypes and RNA-seq data were available. RNA-expression and eQTL analysis of  
8 the first dataset of 29 samples has been previously described here<sup>28</sup>. The second dataset  
9 consisting of 87 samples were collected and RNA was extracted as previously described<sup>25</sup>.  
10 Post RNA isolation, multiplexed libraries were sequenced on the Illumina HiSeq 2000  
11 (75bp paired-end read length). Sample QC was carried out using FastQC  
12 (<https://www.bioinformatics.babraham.ac.uk/projects/fastqc/>) and transcript-level  
13 quantification was performed using salmon<sup>29</sup> based on the GRCh38 cDNA assembly  
14 [[http://ftp.ensembl.org/pub/release-87/fasta/homo\\_sapiens/cdna/](http://ftp.ensembl.org/pub/release-87/fasta/homo_sapiens/cdna/)]. Transcript-level  
15 estimates were summarized to gene-level estimates (scaled transcripts per million)  
16 based on Ensembl gene IDs using tximport<sup>30</sup>. Only genes with  $\geq 1$  count per million in  
17  $\geq 20\%$  samples were kept, with 87 low-grade cartilage samples and 15,249 genes post QC.  
18 All 87 individuals were genotyped using Illumina HumanCoreExome. Genotypes were  
19 called using GenCall and mapped to GRC37/hg19. Following sample and variant QC, we  
20 imputed up to HRC panel v1.1 using the Michigan imputation server  
21 (<https://imputationserver.sph.umich.edu/index.html>). We followed the GTEx approach  
22 for eQTL analysis<sup>31</sup>. Briefly, we normalized gene expression between samples using  
23 weighted trimmed mean of M-values implemented in edgeR<sup>27</sup>. For each gene, expression  
24 across samples was normalized using an inverse normal transformation. To identify cis-  
25 eQTLs within 1Mb either direction of a gene transcription start site, we used the GTEx  
26 modified version of FastQTL (<https://github.com/francois-a/fastqtl>; v6p), including 15  
27 Probabilistic Estimation of Expression Residuals (PEER) factors<sup>32</sup>, sex and genotype  
28 array as covariates. We generated empirical p-values, with a 5% Storey-Tibshirani FDR  
29 cut-off to identify genes with a significant eQTL<sup>33</sup>. The normalised effect size (NES) of  
30 each eQTL is reported for the alternate allele.

#### 31 32 *Methylation quantitative trait loci analysis*

1 We used cartilage CpG methylation and genotype data that had been generated  
2 previously using Illumina's Infinium HumanMethylation450 array and  
3 HumanOmniExpress array, respectively<sup>34</sup>. Methylation and genotype data were  
4 generated from 87 patients who had undergone knee or hip joint arthroplasty: 57 knee  
5 OA patients, 14 hip OA patients and 16 control patients who had undergone hip  
6 replacement due to a neck-of-femur (NOF) fracture. If the SNP reported as associated  
7 with OA in the GWAS was directly genotyped on the HumanOmniExpress array, that SNP  
8 data was used by us. If the SNP was not, we searched for and, where possible, used a proxy  
9 SNP that was in perfect or high LD (pairwise  $r^2 > 0.7$ ) with the association SNP. Proxies  
10 were derived from a candidate list using LDlink's LDproxy tool<sup>35</sup> and European  
11 population data. Where multiple proxies were identified, the one with the highest  $r^2$   
12 relative to the association SNP was chosen. For each locus, we covered a 1Mb region  
13 encompassing 500kb upstream and 500kb downstream of the association SNP. For each  
14 CpG within the 1Mb, linear regression was used to measure the relationship between  
15 methylation in the form of M-values and genotype (0, 1 or 2 copies of the minor allele) at  
16 the OA association SNP or its proxy. Age, sex and joint site/condition were added into the  
17 model as covariates. Methylation status is reported using  $\beta$ -values (ranging from 0 for no  
18 methylation to 1 for 100% methylation). mQTL calculations were performed using Matrix  
19 eQTL<sup>36</sup> implementing a false discovery rate (FDR) estimation that is based on the  
20 Benjamini-Hochberg FDR procedure<sup>37</sup> and which accounts for the number of tests  
21 performed.

22

23



## 1 References

- 2 1. Ikram MA, Brusselle GGO, Murad SD, et al. The Rotterdam Study: 2018 update on objectives,  
3 design and main results. *Eur J Epidemiol* 2017;32:807-50.
- 4 2. Dahaghin S, Bierma-Zeinstra SM, Ginai AZ, Pols HA, Hazes JM, Koes BW. Prevalence and  
5 pattern of radiographic hand osteoarthritis and association with pain and disability (the Rotterdam  
6 study). *Ann Rheum Dis* 2005;64:682-7.
- 7 3. Kellgren JH, Lawrence JS. Radiological Assessment of Osteo-Arthrosis. *Ann Rheum Dis*  
8 1957;16:494-502.
- 9 4. Dawber TR, Meadors GF, Moore FE. Epidemiological Approaches to Heart Disease: The  
10 Framingham Study \*. *Am J Public Health Nations Health* 1951;41:279-86.
- 11 5. Kannel WB, Feinleib M, McNamara PM, Garrison RJ, Castelli WP. An investigation of  
12 coronary heart disease in families. The Framingham offspring study. *Am J Epidemiol* 1979;110:281-  
13 90.
- 14 6. Haugen IK, Englund M, Aliabadi P, et al. Prevalence, incidence and progression of hand  
15 osteoarthritis in the general population: the Framingham Osteoarthritis Study. *Ann Rheum Dis*  
16 2011;70:1581-6.
- 17 7. den Hollander W, Boer CG, Hart DJ, et al. Genome-wide association and functional studies  
18 identify a role for matrix Gla protein in osteoarthritis of the hand. *Ann Rheum Dis* 2017;76:2046-53.
- 19 8. McCarthy S, Das S, Kretzschmar W, et al. A reference panel of 64,976 haplotypes for  
20 genotype imputation. *Nat Genet* 2016;48:1279-83.
- 21 9. Zhan X, Hu Y, Li B, Abecasis GR, Liu DJ. RVTESTS: an efficient and comprehensive tool for rare  
22 variant association analysis using sequence data. *Bioinformatics* 2016;32:1423-6.
- 23 10. Day FR, Loh PR, Scott RA, Ong KK, Perry JR. A Robust Example of Collider Bias in a Genetic  
24 Association Study. *Am J Hum Genet* 2016;98:392-3.
- 25 11. Willer CJ, Li Y, Abecasis GR. METAL: fast and efficient meta-analysis of genomewide  
26 association scans. *Bioinformatics* 2010;26:2190-1.
- 27 12. Pe'er I, Yelensky R, Altshuler D, Daly MJ. Estimation of the multiple testing burden for  
28 genomewide association studies of nearly all common variants. *Genetic epidemiology* 2008;32:381-  
29 5.
- 30 13. Yang J, Lee SH, Goddard ME, Visscher PM. GCTA: a tool for genome-wide complex trait  
31 analysis. *Am J Hum Genet* 2011;88:76-82.
- 32 14. R: A language and environment for statistical computing. R Foundation for Statistical  
33 Computing, Vienna, Austria., 2014. at [http://www.R-project.org/.](http://www.R-project.org/)
- 34 15. Styrkarsdottir U, Lund SH, Thorleifsson G, et al. Meta-analysis of Icelandic and UK data sets  
35 identifies missense variants in SMO, IL11, COL11A1 and 13 more new loci associated with  
36 osteoarthritis. *Nat Genet. United States*2018:1681-7.
- 37 16. Styrkarsdottir U, Thorleifsson G, Helgadóttir HT, et al. Severe osteoarthritis of the hand  
38 associates with common variants within the ALDH1A2 gene and with rare variants at 1p31. *Nat*  
39 *Genet* 2014;46:498-502.
- 40 17. Watanabe K, Taskesen E, van Bochoven A, Posthuma D. Functional mapping and annotation  
41 of genetic associations with FUMA. *Nat Commun* 2017;8:1826.
- 42 18. Ward LD, Kellis M. HaploReg v4: systematic mining of putative causal variants, cell types,  
43 regulators and target genes for human complex traits and disease. *Nucleic Acids Res* 2016;44:D877-  
44 81.
- 45 19. Kundaje A, Meuleman W, Ernst J, et al. Integrative analysis of 111 reference human  
46 epigenomes. *Nature* 2015;518:317-30.
- 47 20. An integrated encyclopedia of DNA elements in the human genome. *Nature* 2012;489:57-74.
- 48 21. Casper J, Zweig AS, Villarreal C, et al. The UCSC Genome Browser database: 2018 update.  
49 *Nucleic Acids Res* 2018;46:D762-d9.

- 1 22. Rouillard AD, Gundersen GW, Fernandez NF, et al. The harmonizome: a collection of  
2 processed datasets gathered to serve and mine knowledge about genes and proteins. Database  
3 (Oxford) 2016;2016.
- 4 23. Richard D, Liu Z, Cao J, et al. Evolutionary Selection and Constraint on Human Knee  
5 Chondrocyte Regulation Impacts Osteoarthritis Risk. Cell 2020.
- 6 24. Steinberg JS, S.; Butterfield, N.C.; Roumeliotis, T.I.; Fontalis A.; Clark, M.J.; Jayasuriya, R.L.;  
7 Swift, D.; Shah, K.M.; Curry, K.F.; Brooks, R.A.; McCaskie, A.W.; Lelliott, C.J.; Choudhary, J.S.; Bassett,  
8 J.H.D.; Williams, G.R.; Wilkinson, J.M.; Zeggini, E. Decoding the genomic basis of osteoarthritis.  
9 bioRxiv 8358502019.
- 10 25. Steinberg J, Ritchie GRS, Roumeliotis TI, et al. Integrative epigenomics, transcriptomics and  
11 proteomics of patient chondrocytes reveal genes and pathways involved in osteoarthritis. Sci Rep  
12 2017;7:8935.
- 13 26. Wang Y, Song F, Zhang B, et al. The 3D Genome Browser: a web-based browser for  
14 visualizing 3D genome organization and long-range chromatin interactions. Genome Biol  
15 2018;19:151.
- 16 27. Robinson MD, McCarthy DJ, Smyth GK. edgeR: a Bioconductor package for differential  
17 expression analysis of digital gene expression data. Bioinformatics 2010;26:139-40.
- 18 28. den Hollander W, Pulyakhina I, Boer C, et al. Annotating Transcriptional Effects of Genetic  
19 Variants in Disease-Relevant Tissue: Transcriptome-Wide Allelic Imbalance in Osteoarthritic  
20 Cartilage. Arthritis Rheumatol 2019;561-70.
- 21 29. Patro R, Duggal G, Love MI, Irizarry RA, Kingsford C. Salmon provides fast and bias-aware  
22 quantification of transcript expression. Nat Methods 2017;14:417-9.
- 23 30. Sonesson C, Love MI, Robinson MD. Differential analyses for RNA-seq: transcript-level  
24 estimates improve gene-level inferences. F1000Res 2015;4:1521.
- 25 31. The Genotype-Tissue Expression (GTEx) project. Nat Genet 2013;45:580-5.
- 26 32. Stegle O, Parts L, Piipari M, Winn J, Durbin R. Using probabilistic estimation of expression  
27 residuals (PEER) to obtain increased power and interpretability of gene expression analyses. Nat  
28 Protoc 2012;7:500-7.
- 29 33. Storey JD, Tibshirani R. Statistical significance for genomewide studies. Proc Natl Acad Sci U S  
30 A 2003;100:9440-5.
- 31 34. Rushton MD, Reynard LN, Young DA, et al. Methylation quantitative trait locus analysis of  
32 osteoarthritis links epigenetics with genetic risk. Hum Mol Genet 2015;24:7432-44.
- 33 35. Machiela MJ, Chanock SJ. LDlink: a web-based application for exploring population-specific  
34 haplotype structure and linking correlated alleles of possible functional variants. Bioinformatics  
35 2015;31:3555-7.
- 36 36. Shabalin AA. Matrix eQTL: ultra fast eQTL analysis via large matrix operations. Bioinformatics  
37 2012;28:1353-8.
- 38 37. Benjamini Y, Drai D, Elmer G, Kafkafi N, Golani I. Controlling the false discovery rate in  
39 behavior genetics research. Behav Brain Res 2001;125:279-84.
- 40
