# Supplementary material for: Genome-wide association of phenotypes based on clustering patterns of hand osteoarthritis identify WNT9A as novel osteoarthritis gene
Source: PubMed Central journal article supplement — Ann Rheum Dis. 2020 Oct 14;80(3):367–75. doi: 10.1136/annrheumdis-2020-217834 (PMC7892373; doi:10.1136/annrheumdis-2020-217834), 2020-10-14
Supplement: annrheumdis-2020-217834supp002.pdf [file annrheumdis-2020-217834supp002.pdf]

## Supplementary Tables

Supplementary materials for *Boer C.G., et al., Stratified hand phenotypes identifies WNT9A as novel gene associated with thumb osteoarthritis.*

### Contents

#### Supplementary tables

- Supplementary table 1: human cartilage eQTL summary statistics meta-analysis results.
- Supplementary table 2: Differential expression in OA cartilage
- Supplementary table 3: Supplementary Table 4: Transcription Factor binding motifs affected by rs11588850

## Supplementary Tables

| Supplementary table 1: human cartilage eQTL summary statistics meta-analysis results. |               |        |         |           |                        |       |    |         |            |
|---------------------------------------------------------------------------------------|---------------|--------|---------|-----------|------------------------|-------|----|---------|------------|
| Gene                                                                                  | Meta-Analysis |        |         |           | Heterogeneity analysis |       |    |         |            |
|                                                                                       | Weight (n)    | Zscore | P-value | Direction | HetISq                 | ChiSq | Df | P-value | Weight (n) |
| ARF1                                                                                  | 116           | -1.81  | 0.0703  | --        | 0                      | 0.042 | 1  | 0.8373  | 116        |
| C1orf35                                                                               | 116           | 1.818  | 0.06901 | ++        | 0                      | 0.223 | 1  | 0.6369  | 116        |
| CDC42BPA                                                                              | 116           | -0.285 | 0.776   | --        | 0                      | 0     | 1  | 0.9968  | 116        |
| GJC2                                                                                  | 29            | 1.192  | 0.2334  | ?+        | 0                      | 0     | 0  | 1       | 29         |
| GUK1                                                                                  | 116           | 0.229  | 0.8192  | + -       | 0                      | 0.215 | 1  | 0.6428  | 116        |
| IBA57                                                                                 | 116           | 2.01   | 0.04439 | ++        | 0                      | 0.81  | 1  | 0.3682  | 116        |
| JMJD4                                                                                 | 29            | -0.686 | 0.4928  | ? -       | 0                      | 0     | 0  | 1       | 29         |
| LINC01641                                                                             | .             | .      | .       | .         | .                      | .     | .  | .       | .          |
| MIR3629                                                                               | .             | .      | .       | .         | .                      | .     | .  | .       | .          |
| MIR5008                                                                               | 29            | 0.021  | 0.9832  | ?+        | 0                      | 0     | 0  | 1       | 29         |
| MRPL55                                                                                | 116           | 0.105  | 0.9165  | ++        | 0                      | 0.001 | 1  | 0.9727  | 116        |
| OBSCN                                                                                 | 116           | 0.412  | 0.6802  | ++        | 0                      | 0.015 | 1  | 0.9021  | 116        |
| OBSCN-AS1                                                                             | .             | .      | .       | .         | .                      | .     | .  | .       | .          |
| PRSS38                                                                                | 29            | 0.135  | 0.8925  | ?+        | 0                      | 0     | 0  | 1       | 29         |
| SNAP47                                                                                | 29            | -1.569 | 0.1166  | ? -       | 0                      | 0     | 0  | 1       | 29         |
| WNT3A                                                                                 | 29            | -0.123 | 0.9024  | ? -       | 0                      | 0     | 0  | 1       | 29         |
| WNT9A                                                                                 | 116           | 1.273  | 0.2029  | + -       | 81.8                   | 5.489 | 1  | 0.01914 | 116        |
| ZNF678                                                                                | 116           | 1.605  | 0.1085  | ++        | 0                      | 0.177 | 1  | 0.6738  | 116        |

OA: osteoarthritis, SE: standard Error, METAL implements Cochran's Q-test for heterogeneity: Df: degrees of Freedom, ChiSq: Chi-Squared test result of heterogeneity, HetISq: heterogeneity  $I^2$  statistic.

| Supplementary table 2: Differential expression in OA cartilage        |              |             |                        |                       |                             |                             |
|-----------------------------------------------------------------------|--------------|-------------|------------------------|-----------------------|-----------------------------|-----------------------------|
| Differential expression OA preserved vs. OA lesioned cartilage (n=21) |              |             |                        |                       |                             |                             |
| GeneNames                                                             | baseMean     | FoldChange  | log2FoldChange         | SE                    | P-value                     | P-value adjusted (FDR)      |
| ARF1                                                                  | 1413.89      | 1.00        | 5.7*10 <sup>-03</sup>  | 3.7*10 <sup>-02</sup> | 0.88                        | 0.95                        |
| C1orf35                                                               | 57.34        | 0.95        | -6.7*10 <sup>-02</sup> | 0.13                  | 0.62                        | 0.82                        |
| CDC42BPA                                                              | 579.25       | 1.06        | 8.9*10 <sup>-02</sup>  | 9.8*10 <sup>-02</sup> | 0.36                        | 0.63                        |
| GJC2                                                                  | 6.57         | 0.67        | -0.58                  | 0.23                  | 1.0*10 <sup>-02</sup>       | 7.4*10 <sup>-02</sup>       |
| GJC2                                                                  | 16.45        | 0.78        | -0.37                  | 0.23                  | 8.6*10 <sup>-02</sup>       | 0.53                        |
| GUK1                                                                  | 697.69       | 1.02        | 2.6*10 <sup>-02</sup>  | 0.10                  | 0.80                        | 0.92                        |
| IBA57                                                                 | 58.63        | 0.84        | -0.25                  | 0.13                  | 4.7*10 <sup>-02</sup>       | 0.20                        |
| JMJD4                                                                 | 129.36       | 0.97        | -4.7*10 <sup>-02</sup> | 0.11                  | 0.67                        | 0.84                        |
| LINC01641                                                             | 0            | 1           | 1.65                   | 2.93                  | 1                           | 1                           |
| MIR5008                                                               | 0.10         | 1.51        | 0.60                   | 2.46                  | 0.34                        | 0.87                        |
| MRPL55                                                                | 113.24       | 1.04        | 0.057                  | 0.13                  | 0.65                        | 0.84                        |
| OBSCN                                                                 | 376.52       | 0.60        | -0.74                  | 0.18                  | 2.7*10 <sup>-05</sup>       | 7.8*10 <sup>-04</sup>       |
| OBSCN-AS1                                                             | 8.94         | 0.55        | -0.86                  | 0.23                  | 1.8*10 <sup>-04</sup>       | 3.6*10 <sup>-03</sup>       |
| PRSS38                                                                | 0.33         | 0.79        | -0.34                  | 2.92                  | 0.64                        | 1                           |
| SNAP47                                                                | 257.91       | 1.11        | 0.16                   | 8.6*10 <sup>-02</sup> | 7.0*10 <sup>-02</sup>       | 0.26                        |
| <b>WNT9A</b>                                                          | <b>98.48</b> | <b>2.42</b> | <b>1.27</b>            | <b>0.20</b>           | <b>4.9*10<sup>-10</sup></b> | <b>9.4*10<sup>-08</sup></b> |
| ZNF678                                                                | 38.41        | 1.08        | 0.11                   | 0.18                  | 0.54                        | 0.77                        |

OA: osteoarthritis, SE: standard Error, BaseMean: mean expression gene (lesioned/preserved cartilage).

| Supplementary Table 3: Transcription Factor binding motifs affected by rs11588850 |               |           |           |        |                                                                                              |         |        |       |   |
|-----------------------------------------------------------------------------------|---------------|-----------|-----------|--------|----------------------------------------------------------------------------------------------|---------|--------|-------|---|
| SNV                                                                               | Chr           | Ref       | Alt       |        |                                                                                              |         |        |       |   |
| rs11588850                                                                        | 1             | A         | G         |        |                                                                                              |         |        |       |   |
| Transcription Factor                                                              | Motif Altered | Ref       | Alt       | Strand | WNT9A                                                                                        | WNT3A   | SNAP47 | JMJD4 |   |
| RAD21                                                                             | Rad21_disc8   | 9.8       | 11.2      | -      | A549 ECC-1<br>GM12878 H1-hESC<br>HCT116 HCT116<br>HeLa-S3 HepG2<br>IMR-90 K562 MCF-7 SK-N-SH | H1-hESC | .      | .     | . |
| AhR/ARNT1 complex                                                                 | AhR::Arnt_1   | 10.4      | 15        | -      | .                                                                                            | .       | .      | .     | . |
| ARNT1                                                                             | Arnt_1        | -<br>14.7 | -<br>10.1 | +      | .                                                                                            | .       | .      | .     | . |
