# Supplementary material for: Genome-wide association of phenotypes based on clustering patterns of hand osteoarthritis identify WNT9A as novel osteoarthritis gene
Source: PubMed Central journal article supplement — Ann Rheum Dis. 2020 Oct 14;80(3):367–75. doi: 10.1136/annrheumdis-2020-217834 (PMC7892373; doi:10.1136/annrheumdis-2020-217834), 2020-10-14
Supplement: annrheumdis-2020-217834supp003.pdf [file annrheumdis-2020-217834supp003.pdf]

## Supplementary Figures

Supplementary materials for *Boer C.G., et al., Stratified hand phenotypes identifies WNT9A as novel gene associated with thumb osteoarthritis.*

### Contents

#### Supplementary figures

- Supplementary figure 1: Tree-dendrogram and multidimensional scaling (MDS) plot of JSN scores in the joints of the hand.
- Supplementary figure 2: Tree-dendrogram and multidimensional scaling (MDS) plot of OST scores in the joints of the hand.
- Supplementary figure 3: Manhattan plot and QQ plot for meta-analysis results of Finger KLsum
- Supplementary figure 4: Manhattan plot and QQ plot for meta-analysis results of Thumb KLsum
- Supplementary figure 5: Manhattan plot and QQ plot for meta-analysis results of Hand KLsum

## Supplementary Figures

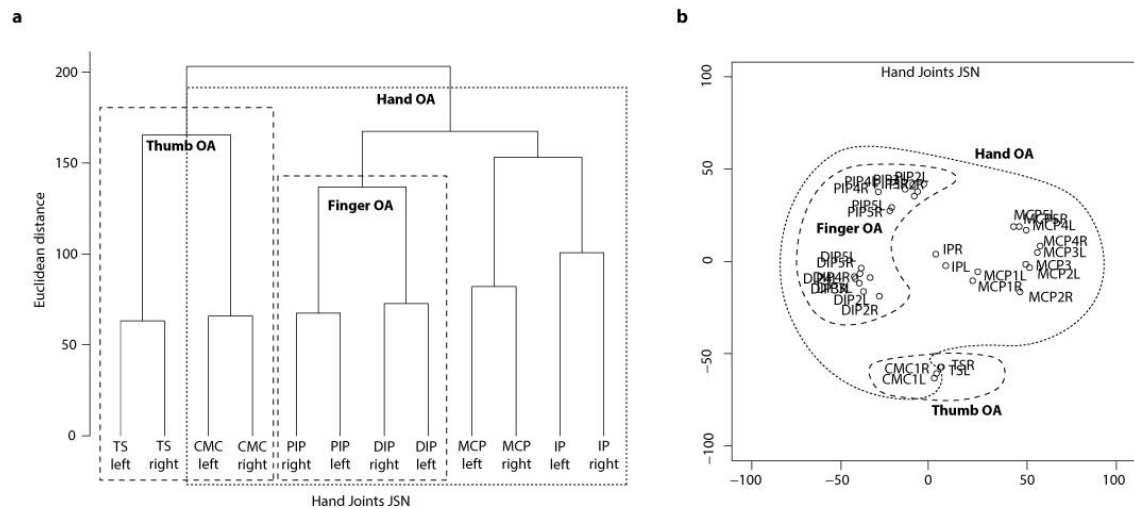

**online supplementary Figure S1: Tree-dendrogram and multidimensional scaling (MDS) plot of JSN scores in the joints of the hand.** a) tree-dendrogram of complete hierarchical clustering of Euclidean distance matrix of JSN scores of groups of joints. Joints were grouped per 'type' and per hand, left or right. b) MDS plot of JSN scores for all hand joints left (L) and right (R), not grouped per "type". Data consisted of all available data from RSI, RSII and RSIII (n=8,691). Selected clusters are depicted by the different dashed lines. OA: osteoarthritis, JSN: joint space narrowing, TS: trapezioscapoid joints, CMC: carpometacarpal joints, PIP: proximal interphalangeal joints, DIP: distal interphalangeal joints, MCP: metacarpophalangeal joints and IP: interphalangeal joints. L/R: left or right joint, number denotes which joint, i.e., PIP2L: the second PIP joint at the left hand.

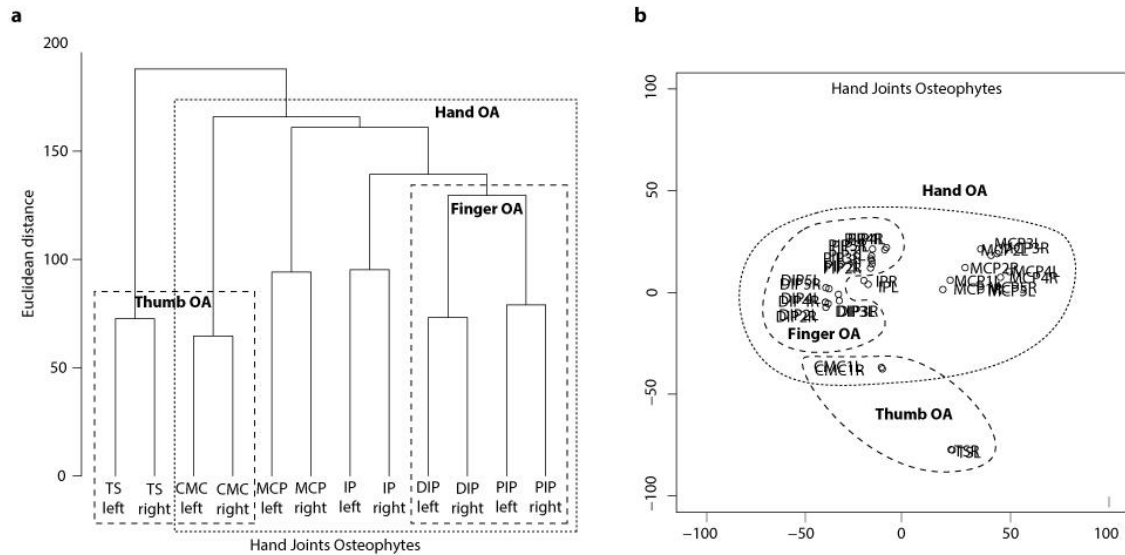

**online supplementary Figure S2: Tree-dendrogram and multidimensional scaling (MDS) plot of OST scores in the joints of the hand.** a) tree-dendrogram of complete hierarchical clustering of Euclidean distance matrix of OST scores of groups of joints. Joints were grouped per ‘type’ and per hand, left or right. b) MDS plot of OST scores for all hand joints left (L) and right (R), not grouped per “type”. Data consisted of all available data from RSI, RSII and RSIII (n=8,691). Selected clusters are depicted by the different dashed lines. OA: osteoarthritis, OST: Osteophytosis, TS: trapezioscapoid joints, CMC: carpometacarpal joints, PIP: proximal interphalangeal joints, DIP: distal interphalangeal joints, MCP: metacarpophalangeal joints and IP: interphalangeal joints. L/R: left or right joint, number denotes which joint, i.e., PIP2L: the second PIP joint at the left hand.

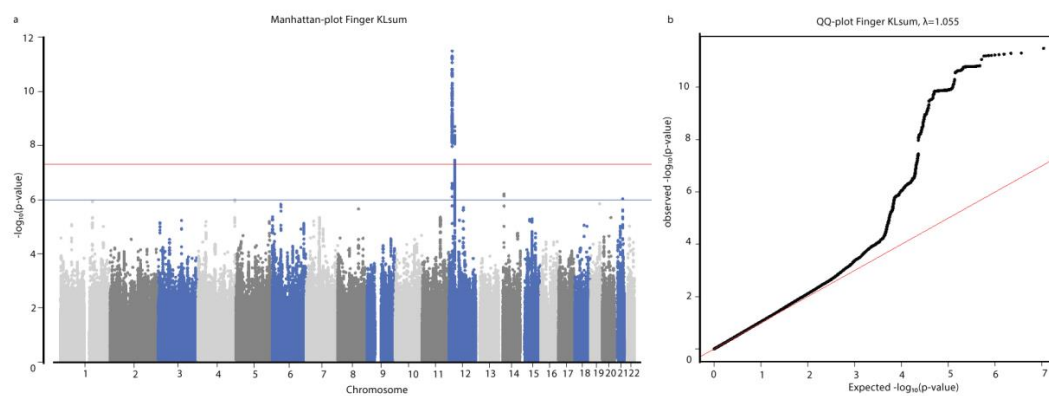

**Supplementary figure 3: Manhattan plot and QQ plot for meta-analysis results of Finger KLsum.** Meta-analysis results are from RS-I, RS-II and RS-III cohorts.

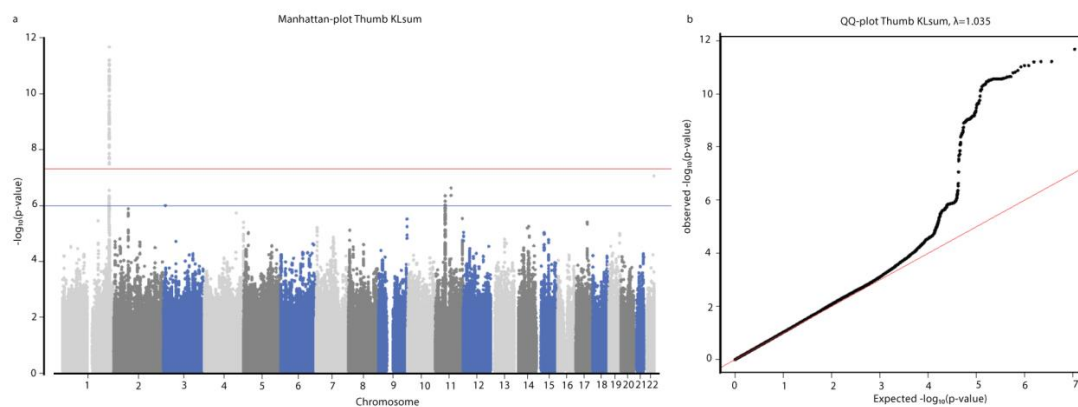

**Supplementary figure 4: Manhattan plot and QQ plot for meta-analysis results of Thumb KLsum.** Meta-analysis results are from RS-I, RS-II and RS-III cohorts.

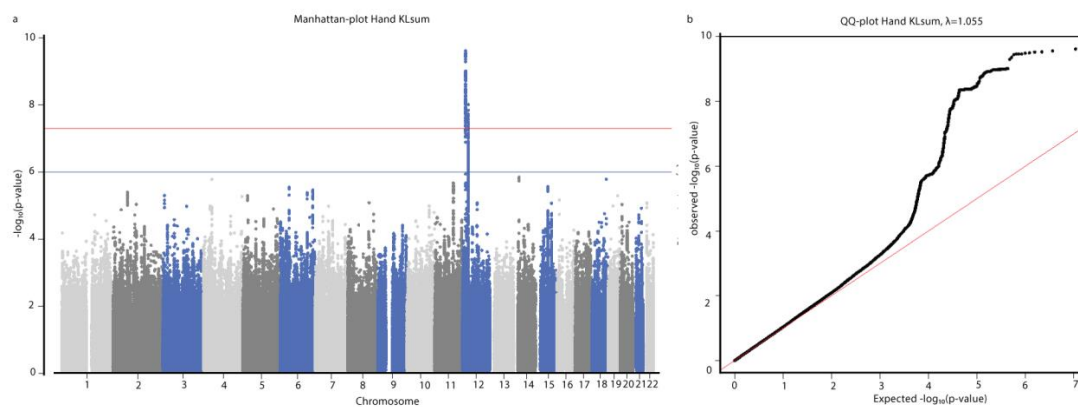

**Supplementary figure 5: Manhattan plot and QQ plot for meta-analysis results of Hand KLsum.** Meta-analysis results are from RS-I, RS-II and RS-III cohorts.
